# Supplementary material for: Determinants of active aging and quality of life among older adults: systematic review
Source: PubMed Central journal article supplement (PMC10330697; doi:10.3389/fpubh.2023.1193789), 2023-06-26
Supplement: Table_1.pdf [file Table_1.pdf]

Appendix 1: Database(s): **EBM Reviews - Cochrane Central Register of Controlled Trials** May 2020, **Embase** 1974 to 2020 June 05, **Ovid MEDLINE(R) and Epub Ahead of Print, In-Process & Other Non-Indexed Citations, Daily and Versions(R)** 1946 to June 05, 2020

Search Strategy:

| #  | Searches                                                                        | Results |
|----|---------------------------------------------------------------------------------|---------|
| 1  | (geriatrics or older adults or elderly or aged people or old age).ti,ab.        | 847074  |
| 2  | active ageing.mp.                                                               | 600     |
| 3  | healthy ageing.mp.                                                              | 3714    |
| 4  | productive ageing.mp.                                                           | 24      |
| 5  | successful ageing.mp.                                                           | 834     |
| 6  | independent living.mp.                                                          | 15957   |
| 7  | participation.ti,ab.                                                            | 360606  |
| 8  | security.ti,ab.                                                                 | 104485  |
| 9  | or/2-8                                                                          | 481135  |
| 10 | (quality of life or QoL).ti,ab.                                                 | 819118  |
| 11 | (health related quality of life or HRQoL or health-related quality of life).mp. | 128087  |
| 12 | (The World Health Organization Quality of Life or WHOQOL).mp.                   | 9688    |
| 13 | (Short Form 36 or SF-36 or SF-6D).mp.                                           | 85875   |
| 14 | LEIPAD.mp.                                                                      | 65      |
| 15 | (Older People's Quality of Life or OPQOL).mp.                                   | 134     |
| 16 | or/10-15                                                                        | 849733  |
| 17 | 1 and 9 and 16                                                                  | 3406    |
| 18 | limit 17 to human [Limit not valid in CCTR; records were retained]              | 3186    |
| 19 | limit 18 to english language                                                    | 2593    |
| 20 | limit 19 to yr="2000 -Current"                                                  | 2514    |
| 21 | remove duplicates from 20                                                       | 1585    |
